1 Restoration of susceptibility to amikacin by 8-hydroxyquinoline analogs complexed to  
2 zinc

3

4

5 Jesus Magallón, Kevin Chiem, Tung Tran, María S. Ramirez, Verónica Jimenez, and

6 Marcelo E. Tolmasky\*

7

8 Center for Applied Biotechnology Studies, Department of Biological Science, College of

9 Natural Sciences and Mathematics, California State University Fullerton, Fullerton, CA

10 92834-6850, United States

11

12

13 \*Corresponding author

14 Email: [mtolmasky@fullerton.edu](mailto:mtolmasky@fullerton.edu) (MET)

15

## 16 **Abstract**

17 Gram-negative pathogens resistant to amikacin and other aminoglycosides of clinical  
18 relevance usually harbor the 6'-N-acetyltransferase type Ib [AAC(6')-Ib], an enzyme that  
19 catalyzes inactivation of the antibiotic by acetylation using acetyl-CoA as donor  
20 substrate. Inhibition of the acetylating reaction could be a way to induce phenotypic  
21 conversion to susceptibility in these bacteria. We have previously observed that Zn<sup>+2</sup>  
22 acts as an inhibitor of the enzymatic acetylation of aminoglycosides by AAC(6')-Ib, and  
23 in complex with ionophores it effectively reduced the levels of resistance *in cellulo*. We  
24 compared the activity of 8-hydroxyquinoline, three halogenated derivatives, and 5-[N-  
25 Methyl-N-Propargylaminomethyl]-8-Hydroxyquinoline in complex with Zn<sup>+2</sup> to inhibit  
26 growth of amikacin-resistant *Acinetobacter baumannii* in the presence of the antibiotic.  
27 Two of the compounds, clioquinol (5-chloro-7-iodo-8-hydroxyquinoline) and 5,7-  
28 diiodo-8-hydroxyquinoline, showed robust inhibition of growth of the two *A. baumannii*  
29 clinical isolates that produce AAC(6')-Ib. However, none of the combinations had any  
30 activity on another amikacin-resistant *A. baumannii* strain that possesses a different,  
31 still unknown mechanism of resistance. Time-kill assays showed that the combination  
32 of clioquinol or 5,7-diiodo-8-hydroxyquinoline with Zn<sup>+2</sup> and amikacin was bactericidal.  
33 Addition of 8-hydroxyquinoline, clioquinol, or 5,7-diiodo-8-hydroxyquinoline, alone or  
34 in combination with Zn<sup>+2</sup>, and amikacin to HEK293 cells did not result in significant  
35 toxicity. These results indicate that ionophores in complex with Zn<sup>+2</sup> could be developed  
36 into potent adjuvants to be used in combination with aminoglycosides to treat Gram-  
37 negative pathogens in which resistance is mediated by AAC(6')-Ib and most probably  
38 other related aminoglycoside modifying enzymes.

## 39 **Introduction**

40 Among many mechanisms bacteria have evolved to resist antibiotics, enzymatic  
41 modification is one of the most efficient [1, 2]. In the case of aminoglycosides,  
42 bactericidal antibiotics used to treat a wide range of bacterial infections, the most  
43 relevant mechanisms of resistance in the clinics are enzymatic inactivation by  
44 acetylation, nucleotidylation, or phosphorylation [2-4]. Although more than hundred  
45 aminoglycoside modifying enzymes have been identified in bacterial pathogens, the  
46 acetyltransferase AAC(6')-Ib, which mediates resistance to amikacin and other  
47 aminoglycosides, is the most widespread among Gram-negative clinical isolates [5-7].  
48 The progressive acquisition of this gene is eroding the usefulness of amikacin as well as  
49 other aminoglycosides. One way to overcome this problem is the design of new  
50 antimicrobials such as the recent introduction of plazomicin [8]. However, since this is  
51 a slow and expensive process and resistance will inevitably develop against the new  
52 antibiotics, these efforts must be complemented by other strategies to prolong the useful  
53 life of existing drugs [2, 3, 9-11]. In the case of aminoglycosides, in addition to design of  
54 new molecules [8, 12, 13], there is active research to find inhibitors of expression of  
55 aminoglycoside modifying enzymes [14-18] and to design enzymatic inhibitors [2, 3, 10,  
56 11, 19-22]. A recent breakthrough in the search for inhibitors of enzymatic inactivation  
57 of aminoglycoside was the finding that  $Zn^{+2}$  and other metal ions inhibit the acetylation  
58 of aminoglycosides mediated by AAC(6')-Ib *in vitro* [23]. Although concentrations  
59 beyond toxic levels were needed to interfere with resistance in growing bacteria, further  
60 research showed that the action of the metal was enhanced when complexed to  
61 ionophores, in which case low concentrations were sufficient to overcome resistance in

62 several aminoglycoside-resistant bacteria [23-26]. We recently showed that two classes  
63 of ionophores, clioquinol (5-chloro-7-iodo-8-hydroxyquinoline)(CI8HQ) and pyrithione  
64 (N-hydroxypyridine-2-thione), when complexed to  $Zn^{+2}$  or  $Cu^{+2}$ , significantly reduce the  
65 levels of resistance to amikacin in *Escherichia coli*, *Klebsiella pneumoniae*, and  
66 *Acinetobacter baumannii* strains harboring the *aac(6')-Ib* gene [24-26]. CI8HQ and other  
67 substituted 8-hydroxyquinolines are being tested as treatment for cancer,  
68 neurodegenerative conditions such as Alzheimer's, Parkinson's, and Huntington's  
69 diseases, and lead poisoning [27-30]. The ongoing studies and uses of these compounds  
70 indicate that human toxicity is not a serious impediment in their development as drugs  
71 for diverse diseases [29, 31]. These facts make CI8HQ and other substituted 8-  
72 hydroxyquinolines excellent candidates to be used in combination with  
73 aminoglycosides in the treatment of resistant infections. In this work we compared the  
74 effect of commercially available substituted 8-hydroxyquinolines complexed to  $Zn^{+2}$  on  
75 growth of amikacin-resistant *A. baumannii* clinical isolates.

76

77

## 78 **Materials and methods**

### 79 **Bacterial strains and reagents**

80 The *A. baumannii* A155, A144, and Ab33405 clinical isolates were used in growth  
81 and time-killing experiments to test the ability of the ionophores complexed to zinc to  
82 reduce resistance to amikacin. All three strains are resistant to amikacin but only A144  
83 and A155 naturally carry *aac(6')-Ib* [32-34]. Ionophores and amikacin sulfate were  
84 purchased from MilliporeSigma. [Acetyl-1-<sup>14</sup>C]-Acetyl Coenzyme A was purchased from  
85 Perkin-Elmer.

86

### 87 **Enzymatic acetylation assays**

88 Acetylation activity was assessed using the phosphocellulose paper binding assay as  
89 described previously [35, 36]. Amikacin and [Acetyl-1-<sup>14</sup>C]-Acetyl Coenzyme A were  
90 used as substrates in reactions carried out in the presence of the soluble content of cells  
91 that were disrupted by sonication as described previously [37]. The reactions were  
92 carried out in a final volume of 25  $\mu$ l containing 200 mM Tris-HCl, pH 7.6, 200  $\mu$ M  
93 amikacin, 0.5  $\mu$ Ci [Acetyl-1-<sup>14</sup>C]-Acetyl Coenzyme A (specific activity, 60 mCi/mmol),  
94 and the enzymatic extract (120  $\mu$ g protein). The reaction mixtures were incubated at  
95 37°C for 1 h and then 20  $\mu$ l were spotted on phosphocellulose paper strips. The  
96 unreacted radioactive donor substrate was eliminated from the phosphocellulose paper  
97 by submersion in 1 l hot water (80°C) followed by several washes with water at room  
98 temperature. The phosphocellulose paper strips were allowed to dry before  
99 determining the radioactivity.

100

## 101 **Growth inhibition and time-kill assays**

102 The inhibition of growth of *A. baumannii* strains by amikacin and ionophore-zinc  
103 complexes was tested inoculating 100- $\mu$ l Mueller-Hinton broth in microtiter plates with  
104 the specified additions using the BioTek Synergy 5 microplate reader [23]. The cultures  
105 were carried out at 37°C with shaking and contained dimethyl sulfoxide (DMSO) at a  
106 final concentration of 0.5%. The optical density at 600 nm (OD<sub>600</sub>) of the cultures was  
107 determined every 20 minutes for 20 h. Time-kill assays were carried out as described  
108 before [38]. Briefly, cells were cultured to 10<sup>6</sup> cfu/ml in Mueller-Hinton broth. At this  
109 point the indicated concentrations of amikacin, ionophore, and zinc were added, and the  
110 cultures were continued at 37°C with shaking. Samples were removed at 0, 4, 8, 20, and  
111 32 h, serially diluted, plated on Mueller-Hinton agar, and incubated at 37°C for 20 hours  
112 to determine the number of cfu/ml.

113

## 114 **Cytotoxicity assays**

115 Levels of cytotoxicity were determined using the LIVE/DEAD Viability/Cytotoxicity  
116 Kit for mammalian cells (Molecular Probes) as described [39]. HEK 293 cells plated at a  
117 density of 10<sup>3</sup> cells/well were cultured overnight under standard conditions in flat  
118 bottom, 96-well, black microtiter plates. The compounds being tested, dissolved in  
119 dimethyl sulfoxide (DMSO), were then added to the cells at increasing concentrations as  
120 indicated, and incubation was continued. As control DMSO was added to duplicate wells  
121 at same final concentration reached when adding the compounds being tested. After 24  
122 h, the cells were washed with sterile D-PBS and incubated with the LIVE/DEAD reagent  
123 (2  $\mu$ M ethidium homodimer 1 and 1  $\mu$ M calcein-AM) for 30 min at 37 °C, and the

124 fluorescence level at 645 nm (dead cells) and 530 nm (live cells) was measured. The  
125 percentage of dead cells was calculated relative to the cells treated with DMSO. The  
126 maximum toxicity control was determined using cells incubated in the presence of 0.1%  
127 Triton X-100 for 10 min. Experiments were conducted in triplicate. The results were  
128 expressed as mean  $\pm$  SD of three independent experiments.

129

130

## 131 **Results**

132       Combination therapies consisting of an antibiotic and an inhibitor of resistance can  
133 be an invaluable tool in the search for solutions to the multidrug resistance problem  
134 [11]. While this strategy has already been reduced to practice in the case of pathogens  
135 resistant to  $\beta$ -lactams [40], efforts to develop inhibitors of resistance to aminoglycosides  
136 are still in experimental stages. We have recently found that ionophores complexed to  
137  $Zn^{+2}$  or  $Cu^{+2}$  could be potentiators that decrease the levels of resistance to amikacin in  
138 *K. pneumoniae* and *A. baumannii* clinical isolates [23-25]. Since one of the ionophores  
139 that in complex with  $Zn^{+2}$  demonstrated activity as an inhibitor of the resistance to  
140 amikacin was Cl8HQ, a substituted 8-hydroxyquinoline (8HQ), we expanded our studies  
141 to other compounds with these characteristics. Fig 1 shows the compounds tested in this  
142 work. The tests were carried out using as models three *A. baumannii* clinical isolates,  
143 two of them harboring the *aac(6')-Ib* gene [32, 33]. The third strain, which does not carry  
144 this gene, exhibits resistance to amikacin by a different mechanism. Although this  
145 mechanism remains to be elucidated, it most probably consists of phosphorylation  
146 mediated by the *aphA6* gene found in its genome [33, 34].

147

148 **Fig 1. Chemical structures of 8-hydroxyquinoline and derivative compounds.**

149

150       Growth curves in the presence of incremental concentrations of amikacin showed  
151 that the strains harboring *aac(6')-Ib*, A144 and A155, can grow in up to 16  $\mu$ g/ml of the  
152 antibiotic (S1 Fig, A and B). Conversely, strain Ab33405 had a different behavior, while  
153 the lag phase became longer as the amikacin concentration was increased, healthy



154 growth was observed at all tested concentrations (S1 Fig, C). These results are in  
155 agreement with the finding that the latter strain resists amikacin using a mechanism  
156 different from that in strains A144 and A155. To confirm that *A. baumannii* Ab33405 is  
157 not able to mediate enzymatic acetylation of amikacin, the total soluble protein extracts  
158 of all three strains were used in *in vitro* acetylation assays using amikacin and AcetylCoA  
159 as substrates. Table 1 shows that while extracts from strains A144 and A155 mediated  
160 incorporation of radioactive acetyl groups to the acceptor substrate, the extract  
161 obtained from strain Ab33405 lacked acetylation activity.

162

163 **Table 1.** AAC(6')-Ib activity

| <i>A. baumannii</i><br>strain | Acetylation (cpm) <sup>1</sup> |
|-------------------------------|--------------------------------|
| A144                          | 898 ± 122                      |
| A155                          | 3298 ± 294                     |
| Ab33405                       | 33 ± 0.7                       |

164 <sup>1</sup>Assays were performed using the phosphocellulose paper assay [36]. The values are  
165 the average of three assays.

166

167

168 The growth of all three *A. baumannii* strains was unaffected by the presence of 25 or  
169 50 µM ZnCl<sub>2</sub> or up to 10 µM 8HQ, Cl8HQ, 5-[N-Methyl-N-propargylaminomethyl]-8-  
170 hydroxyquinoline (MP8HQ), or 5,7-diiodo-8-hydroxyquinoline (II8HQ) (S1 Fig, A-C).  
171 Conversely, 10 µM 7-Bromo-8-hydroxyquinoline (B8HQ) was toxic to all three strains,  
172 and while strains A155 and Ab33405 could grow in the presence of up to 5 µM, strain  
173 A144 growth was inhibited at 1 µM B8HQ (S1 Fig, A-C).

174 Once concentrations of the ionophores and  $ZnCl_2$  that were not toxic to growing  
175 bacteria were identified, their activity as potentiators of amikacin was determined.  
176 These assays showed that CI8HQ and II8HQ were the only 8HQ derivatives that  
177 mediated phenotypic conversion to susceptibility to amikacin in strains A144 and A155  
178 (Fig 2). Inspection of these results also showed that after 16 h, strain A155 started to  
179 grow when the ionophore tested was II8HQ. We do not yet have a satisfactory  
180 explanation for this observation. The ionophores 8HQ and MP8HQ were unable to  
181 induce any modification in the growth of strains A144 and A155 in the presence of  
182 amikacin and  $ZnCl_2$  (Fig 2). The tests where the ionophore used was B8HQ showed a  
183 reduction in growth in the presence of combinations that included B8HQ but either  
184 amikacin or  $ZnCl_2$  were omitted suggesting that the toxic effect of B8HQ is playing a role  
185 in growth inhibition rather than interference with acetylation of amikacin (Fig 2). Strain  
186 Ab33405 showed healthy growth in the presence of either of the ionophores plus  
187 amikacin and  $ZnCl_2$  confirming that the inhibition by  $Zn^{+2}$  is specific for resistance  
188 mediated by the modifying enzyme. Only one condition showed modest inhibition of  
189 growth (see Fig 2, strain Ab33405, CI8HQ) but some reduction in growth is also  
190 observed in the absence of  $ZnCl_2$ , which may indicate unspecific inhibition. These results  
191 taken together with previous studies, especially those by Li et al. where the authors  
192 show that  $Zn^{+2}$  inhibits several modifying enzymes, indicate that ionophores complexed  
193 to metal ions can be an excellent strategy to interfere with resistance to  
194 aminoglycosides. However, this option might be effective only in cases of resistance  
195 mediated by selected aminoglycoside modifying enzymes. Interestingly, a recent report  
196 described that the metal homeostasis-disrupting action of ionophore-zinc complexes

197 potentiates several antibiotics to restore susceptibility in resistant Gram-positive  
198 bacteria [41].

199

200 **Fig 2. Effect of ionophore-zinc complexes on resistance to amikacin in *A.***  
201 ***baumannii* strains.** *A. baumannii* A155 (panels to the left), A144 (center panels) or  
202 Ab33405 (panels to the right) were cultured in 100 µl Mueller-Hinton broth in  
203 microtiter plates at 37°C, with the additions indicated in the figure and the OD<sub>600</sub> was  
204 periodically determined. The concentrations used were 8 µg/ml amikacin, 25 µM ZnCl<sub>2</sub>,  
205 5 µM ionophore. A, amikacin; Z, ZnCl<sub>2</sub>.

206

207 The results described above showed that CI8HQ and II8HQ were the most efficient  
208 ionophores that in complex with Zn<sup>+2</sup> were able to mediate a conversion to susceptibility  
209 to amikacin in those *A. baumannii* strains in which resistance is mediated by AAC(6')-Ib.  
210 The bactericidal effect of the combination ionophore-zinc and amikacin was confirmed  
211 using time-kill assays. Amikacin at a concentration as low as 8 µg/ml showed a robust  
212 bactericidal activity on *A. baumannii* A144 and A155 strains in the presence of the  
213 complexes (Fig 3). As expected, these strains did not lose viability when incubated with  
214 the antibiotic or any other combination of components that did not include all three of  
215 them (Fig 3). Also expected was the absence of bactericidal effect when the  
216 combinations ionophore-zinc plus amikacin were added to cultures of *A. baumannii*  
217 Ab33405 or the ionophore utilized was 8HQ (Fig 3). These results confirmed that  
218 amikacin can regain its bactericidal power in the presence of Zn<sup>+2</sup> ions when resistance  
219 is due to AAC(6')-Ib-mediated acetylation.

220

221 **Fig 3. Time-kill assay curves for amikacin in the presence of ionophore-zinc**

222 **complexes.** *A. baumannii* A155 (panels to the left), A144 (center panels) or Ab33405

223 (panels to the right) were cultured in 100  $\mu$ l Mueller-Hinton broth in microtiter plates

224 at 37°C, with the additions indicated in the figure and the OD<sub>600</sub> was periodically

225 determined. A, amikacin; Z, ZnCl<sub>2</sub>; I, ionophore.

226

227 The ionophores tested in this work were used in a standard cytotoxicity assay as

228 described in the Materials and Methods section. Addition of 8HQ, Cl8HQ, or I18HQ, alone

229 (S2 Fig) or in combination with amikacin and Zn<sub>2</sub>Cl to the cells did not result in

230 significant toxicity (Fig 4).

231

232 **Fig. 4. Cytotoxicity tests.** Cytotoxicity on HEK293 cells treated with the indicated

233 concentrations of the different compounds for 24 h was assayed using a LIVE/DEAD

234 kit. The percentage of dead cells was calculated relative to the cells treated with DMSO.

235 Cells incubated with 0.1% Triton X-100 for 10 min were used as a control for

236 maximum toxicity. Experiments were conducted in triplicate and the values are mean

237  $\pm$  SD. Black bars show survival in the presence of 5  $\mu$ M ionophore. Stippled bars show

238 survival in the presence of 5  $\mu$ M ionophore, 25  $\mu$ M ZnCl<sub>2</sub>, and 8  $\mu$ g/ml amikacin. The

239 same concentrations were used to determine survival in amikacin (white bar) and

240 ZnCl<sub>2</sub> (hatched bar). The concentration of DMSO used in the control was  $\mu$ M (gray bar).

241

242

## 243 **Discussion**

244 Numerous approaches are being pursued to combat the current crisis of antibiotic  
245 resistance [11, 12]. In addition to the efforts to find or design new classes of antibiotics,  
246 researchers are looking for new scaffolds or attempting to modify existing antimicrobial  
247 families or designing compounds that act as adjuvant of these antibiotics by interfering  
248 with resistance [12, 42-46]. We have recently found that  $Zn^{+2}$ , when complexed to  
249 ionophores such as pyrithione or Cl8HQ, significantly reduces the levels of resistance to  
250 amikacin mediated by the AAC(6')-Ib enzyme [23-25]. Since this enzyme is the most  
251 prevalent in amikacin resistant infections in the clinics [6], this finding represented a  
252 significance advance in the search for compounds that in combination with the antibiotic  
253 can help extend its useful life. The obvious possibilities of these compounds as part of  
254 formulations composed of amikacin and the inhibitor warrant further research to find  
255 the best ionophores. Since Cl8HQ is a derivative of 8HQ, in this work we tested  
256 combinations of  $Zn^{+2}$  with 8HQ and other commercially available derivatives. While  
257 Cl8HQ and Ii8HQ show similar capacity to reverse resistance to amikacin, 8HQ and  
258 MP8HQ did not show any of the desired inhibitory activity, and B8HQ exhibited  
259 antimicrobial activity in the absence of the antibiotic. The disparity of effects found  
260 among these chemically related compounds shows the importance of assessing the  
261 activity of ionophores with similar structures. Since one of the most crucial problems  
262 exhibited by numerous compounds that are otherwise good drug or adjuvant candidates  
263 is their toxicity, it was interesting that the ionophores tested in this work did not show  
264 cytotoxicity in our assays. Furthermore, as they are being researched as treatments of  
265 other human conditions, their low toxicity has also been established by other

266 laboratories. Taken together, the results described in this work indicate that  $Zn^{+2}$  or  
267 other cations, complexed to ionophores are firm candidates to be developed as  
268 potentiators to aminoglycosides to overcome resistance, in particular CI8HQ and II8HQ  
269 are excellent candidates as adjuvants to overcome AAC(6')-Ib -mediated resistance to  
270 amikacin.

271

272

273 **Acknowledgements**

274       This work was supported by Public Health Service grant 2R15AI047115 from the  
275 National Institute of Allergy and Infectious Diseases, National Institutes of Health.

276

277

278

## 279 **References**

- 280 1. Lin J, Nishino K, Roberts MC, Tolmasky M, Aminov RI, Zhang L. Mechanisms of  
281 antibiotic resistance. *Front Microbiol.* 2015;6:34. doi: 10.3389/fmicb.2015.00034.  
282 PubMed PMID: 25699027; PubMed Central PMCID: PMC4318422.
- 283 2. Ramirez MS, Tolmasky ME. Aminoglycoside modifying enzymes. *Drug Resist Updat.*  
284 2010;13(6):151-71. doi: 10.1016/j.drup.2010.08.003. PubMed PMID: 20833577;  
285 PubMed Central PMCID: PMC2992599.
- 286 3. Labby KJ, Garneau-Tsodikova S. Strategies to overcome the action of  
287 aminoglycoside-modifying enzymes for treating resistant bacterial infections.  
288 *Future Med Chem.* 2013;5(11):1285-309. doi: 10.4155/fmc.13.80. PubMed PMID:  
289 23859208; PubMed Central PMCID: PMC3819198.
- 290 4. Garneau-Tsodikova S, Labby KJ. Mechanisms of resistance to aminoglycoside  
291 antibiotics: overview and perspectives. *MedChemComm.* 2016;7(1):11-27. doi:  
292 10.1039/C5MD00344J. PubMed PMID: 26877861; PubMed Central PMCID:  
293 PMC4752126.
- 294 5. Ramirez MS, Nikolaidis N, Tolmasky ME. Rise and dissemination of aminoglycoside  
295 resistance: the *aac(6')-Ib* paradigm. *Front Microbiol.* 2013;4:121. doi:  
296 10.3389/fmicb.2013.00121. PubMed PMID: 23730301; PubMed Central PMCID:  
297 PMC3656343.
- 298 6. Vakulenko SB, Mobashery S. Versatility of aminoglycosides and prospects for their  
299 future. *Clin Microbiol Rev.* 2003;16(3):430-50. Epub 2003/07/15. PubMed PMID:  
300 12857776.



- 301 7. Ramirez MS, Tolmasky ME. Amikacin: uses, resistance, and prospects for inhibition.  
302 Molecules. 2017;22(12):2267. Epub 2017/12/20. doi:  
303 10.3390/molecules22122267. PubMed PMID: 29257114; PubMed Central PMCID:  
304 PMCPMC5889950.
- 305 8. Castanheira M, Deshpande LM, Woosley LN, Serio AW, Krause KM, Flamm RK.  
306 Activity of plazomicin compared with other aminoglycosides against isolates from  
307 European and adjacent countries, including Enterobacteriaceae molecularly  
308 characterized for aminoglycoside-modifying enzymes and other resistance  
309 mechanisms. J Antimicrob Chemother. 2018;73(12):3346-54. doi:  
310 10.1093/jac/dky344. PubMed PMID: 30219857.
- 311 9. Ju LC, Cheng Z, Fast W, Bonomo RA, Crowder MW. The continuing challenge of  
312 metallo-beta-lactamase inhibition: mechanism matters. Trends Pharmacol Sci.  
313 2018;39(7):635-47. doi: 10.1016/j.tips.2018.03.007. PubMed PMID: 29680579;  
314 PubMed Central PMCID: PMC6005755.
- 315 10. Vong K, Auclair K. Understanding and overcoming aminoglycoside resistance caused  
316 by *N*-6'-acetyltransferase. MedChemComm. 2012;3(4):397-407. doi:  
317 10.1039/C2MD00253A. PubMed PMID: 28018574; PubMed Central PMCID:  
318 PMC5179255.
- 319 11. Tolmasky ME. Strategies to prolong the useful life of existing antibiotics and help  
320 overcoming the antibiotic resistance crisis. In: Rahman A-u, editor. Frontiers in  
321 Clinical Drug Research - Anti-Infectives. 4: Bentham Science Publishers; 2017. p. 3-  
322 29.

- 323 12. Chandrika N, Garneau-Tsodikova S. A review of patents (2011–2015) towards  
324 combating resistance to and toxicity of aminoglycosides. *MedChemComm*.  
325 2015;7:50-68.
- 326 13. Chandrika N, Green KD, Houghton JL, Garneau-Tsodikova S. Synthesis and Biological  
327 Activity of Mono- and Di-N-acylated Aminoglycosides. *ACS Med Chem Lett*.  
328 2015;6(11):1134-9. doi: 10.1021/acsmchemlett.5b00255. PubMed PMID:  
329 26617967; PubMed Central PMCID: PMC4645238.
- 330 14. Jackson A, Jani S, Sala CD, Soler-Bistue AJ, Zorreguieta A, Tolmasky ME. Assessment  
331 of configurations and chemistries of bridged nucleic acids-containing oligomers as  
332 external guide sequences: a methodology for inhibition of expression of antibiotic  
333 resistance genes. *Biol Methods Protoc*. 2016;1(1):bpw001. doi:  
334 10.1093/biomethods/bpw001. PubMed PMID: 27857983; PubMed Central PMCID:  
335 PMC5108630.
- 336 15. Lopez C, Arivett BA, Actis LA, Tolmasky ME. Inhibition of AAC(6')-Ib-mediated  
337 resistance to amikacin in *Acinetobacter baumannii* by an antisense peptide-  
338 conjugated 2',4'-bridged nucleic acid-NC-DNA hybrid oligomer. *Antimicrob Agents*  
339 *Chemother*. 2015;59(9):5798-803. doi: 10.1128/AAC.01304-15. PubMed PMID:  
340 26169414; PubMed Central PMCID: PMC4538503.
- 341 16. Sarno R, Ha H, Weinsetel N, Tolmasky ME. Inhibition of aminoglycoside 6'-N-  
342 acetyltransferase type Ib-mediated amikacin resistance by antisense  
343 oligodeoxynucleotides. *Antimicrob Agents Chemother*. 2003;47(10):3296-304.  
344 PubMed PMID: 14506044; PubMed Central PMCID: PMC201158.

- 345 17. Soler Bistue AJ, Ha H, Sarno R, Don M, Zorreguieta A, Tolmasky ME. External guide  
346 sequences targeting the *aac(6')-Ib* mRNA induce inhibition of amikacin resistance.  
347 Antimicrob Agents Chemother. 2007;51(6):1918-25. doi: 10.1128/AAC.01500-06.  
348 PubMed PMID: 17387154; PubMed Central PMCID: PMC1891410.
- 349 18. Soler Bistue AJ, Martin FA, Vozza N, Ha H, Joaquin JC, Zorreguieta A, et al. Inhibition  
350 of *aac(6')-Ib*-mediated amikacin resistance by nuclease-resistant external guide  
351 sequences in bacteria. Proc Natl Acad Sci USA. 2009;106(32):13230-5. doi:  
352 10.1073/pnas.0906529106. PubMed PMID: 19666539; PubMed Central PMCID:  
353 PMC2726421.
- 354 19. Guan J, Vong K, Wee K, Fakhoury J, Dullaghan E, Auclair K. Cellular studies of an  
355 aminoglycoside potentiator reveal a new inhibitor of aminoglycoside resistance.  
356 Chembiochem. 2018;19(19):2107-13. doi: 10.1002/cbic.201800368. PubMed PMID:  
357 30059603.
- 358 20. Wright GD. Mechanisms of resistance to antibiotics. Curr Opin Chem Biol.  
359 2003;7(5):563-9. Epub 2003/10/29. PubMed PMID: 14580559.
- 360 21. Zarate SG, De la Cruz Claire ML, Benito-Arenas R, Revuelta J, Santana AG, Bastida A.  
361 Overcoming aminoglycoside enzymatic resistance: design of novel antibiotics and  
362 inhibitors. Molecules. 2018;23(2):284. Epub 2018/02/02. doi:  
363 10.3390/molecules23020284. PubMed PMID: 29385736; PubMed Central PMCID:  
364 PMCPMC6017855.
- 365 22. Chiem K, Jani S, Fuentes B, Lin DL, Rasche M, Tolmasky ME. Identification of an  
366 inhibitor of the aminoglycoside 6' -N-acetyltransferase type Ib [AAC(6')-Ib] by  
367 glide molecular docking. MedChemComm. 2016;7:184-9.

- 368 23. Lin DL, Tran T, Alam JY, Herron SR, Ramirez MS, Tolmasky ME. Inhibition of  
369 aminoglycoside 6'-N-acetyltransferase type Ib by zinc: reversal of amikacin  
370 resistance in *Acinetobacter baumannii* and *Escherichia coli* by a zinc ionophore.  
371 Antimicrob Agents Chemother. 2014;58(7):4238-41. doi: 10.1128/AAC.00129-14.  
372 PubMed PMID: 24820083; PubMed Central PMCID: PMC4068593.
- 373 24. Chiem K, Fuentes BA, Lin DL, Tran T, Jackson A, Ramirez MS, et al. Inhibition of  
374 aminoglycoside 6'-N-acetyltransferase type Ib-mediated amikacin resistance in  
375 *Klebsiella pneumoniae* by zinc and copper pyrithione. Antimicrob Agents Chemother.  
376 2015;59(9):5851-3. doi: 10.1128/AAC.01106-15. PubMed PMID: 26169410;  
377 PubMed Central PMCID: PMC4538519.
- 378 25. Chiem K, Hue F, Magallon J, Tolmasky ME. Inhibition of aminoglycoside 6'-N-  
379 acetyltransferase type Ib-mediated amikacin resistance by zinc complexed to  
380 clioquinol, an ionophore active against tumors and neurodegenerative diseases. Int  
381 J Antimicrob Agents. 2017;51:271-3. Epub 2017/08/08. doi:  
382 10.1016/j.ijantimicag.2017.08.002. PubMed PMID: 28782708.
- 383 26. Li Y, Green KD, Johnson BR, Garneau-Tsodikova S. Inhibition of aminoglycoside  
384 acetyltransferase resistance enzymes by metal salts. Antimicrob Agents Chemother.  
385 2015;59(7):4148-56. doi: 10.1128/AAC.00885-15. PubMed PMID: 25941215;  
386 PubMed Central PMCID: PMC4468725.
- 387 27. Lind SE, Park JS, Drexler JW. Pyrithione and 8-hydroxyquinolines transport lead  
388 across erythrocyte membranes. Transl Res. 2009;154(3):153-9. doi:  
389 10.1016/j.trsl.2009.06.002. PubMed PMID: 19665691.

- 390 28. Chan SH, Chui CH, Chan SW, Kok SH, Chan D, Tsoi MY, et al. Synthesis of 8-  
391 hydroxyquinoline derivatives as novel antitumor agents. *ACS Med Chem Lett.*  
392 2013;4(2):170-4. doi: 10.1021/ml300238z. PubMed PMID: 24900641; PubMed  
393 Central PMCID: PMC4027363.
- 394 29. Bareggi SR, Cornelli U. Clioquinol: review of its mechanisms of action and clinical  
395 uses in neurodegenerative disorders. *CNS Neurosci Ther.* 2012;18(1):41-6. doi:  
396 10.1111/j.1755-5949.2010.00231.x. PubMed PMID: 21199452.
- 397 30. Mao X, Li X, Sprangers R, Wang X, Venugopal A, Wood T, et al. Clioquinol inhibits the  
398 proteasome and displays preclinical activity in leukemia and myeloma. *Leukemia.*  
399 2009;23(3):585-90. Epub 2008/08/30. doi: 10.1038/leu.2008.232. PubMed PMID:  
400 18754030.
- 401 31. Mao X, Schimmer AD. The toxicology of clioquinol. *Toxicol Lett.* 2008;182(1-3):1-6.  
402 Epub 2008/09/25. doi: 10.1016/j.toxlet.2008.08.015. PubMed PMID: 18812216.
- 403 32. Ramirez MS, Vilacoba E, Stietz MS, Merkier AK, Jeric P, Limansky AS, et al. Spreading  
404 of AbaR-type genomic islands in multidrug resistance *Acinetobacter baumannii*  
405 strains belonging to different clonal complexes. *Curr Microbiol.* 2013;67(1):9-14.  
406 Epub 2013/02/12. doi: 10.1007/s00284-013-0326-5. PubMed PMID: 23397241.
- 407 33. Traglia G, Chiem K, Quinn B, Fernandez JS, Montana S, Almuzara M, et al. Genome  
408 sequence analysis of an extensively drug-resistant *Acinetobacter baumannii* indigo-  
409 pigmented strain depicts evidence of increase genome plasticity. *Sci Rep.*  
410 2018;8(1):16961. Epub 2018/11/18. doi: 10.1038/s41598-018-35377-5. PubMed  
411 PMID: 30446709; PubMed Central PMCID: PMC6240043.

- 412 34. Traglia G, Vilacoba E, Almuzara M, Diana L, Iriarte A, Centron D, et al. Draft genome  
413 sequence of an extensively drug-resistant *Acinetobacter baumannii* indigo-  
414 pigmented strain. *Genome Announc.* 2014;2(6):e01146-14. Epub 2014/11/15. doi:  
415 10.1128/genomeA.01146-14. PubMed PMID: 25395633; PubMed Central PMCID:  
416 PMCPMC4241659.
- 417 35. Tolmasky ME, Roberts M, Woloj M, Crosa JH. Molecular cloning of amikacin  
418 resistance determinants from a *Klebsiella pneumoniae* plasmid. *Antimicrob Agents*  
419 *Chemother.* 1986;30(2):315-20. Epub 1986/08/01. PubMed PMID: 3021052;  
420 PubMed Central PMCID: PMCPMC180541.
- 421 36. Haas MJ, Dowding JE. Aminoglycoside-modifying enzymes. *Methods Enzymol.*  
422 1975;43:611-28. Epub 1975/01/01. PubMed PMID: 166284.
- 423 37. Woloj M, Tolmasky ME, Roberts MC, Crosa JH. Plasmid-encoded amikacin resistance  
424 in multiresistant strains of *Klebsiella pneumoniae* isolated from neonates with  
425 meningitis. *Antimicrob Agents Chemother.* 1986;29(2):315-9. PubMed PMID:  
426 3521478; PubMed Central PMCID: PMC176398.
- 427 38. Petersen PJ, Labthavikul P, Jones CH, Bradford PA. In vitro antibacterial activities of  
428 tigecycline in combination with other antimicrobial agents determined by  
429 chequerboard and time-kill kinetic analysis. *J Antimicrob Chemother.*  
430 2006;57(3):573-6. doi: 10.1093/jac/dki477. PubMed PMID: 16431863.
- 431 39. Tran T, Chiem K, Jani S, Arivett BA, Lin DL, Lad R, et al. Identification of a small  
432 molecule inhibitor of the aminoglycoside 6'-N-acetyltransferase type Ib [AAC(6')-Ib]  
433 using mixture-based combinatorial libraries. *Int J Antimicrob Agents.*

- 434 2018;51(5):752-61. doi: 10.1016/j.ijantimicag.2018.01.019. PubMed PMID:  
435 29410367.
- 436 40. Papp-Wallace KM, Bonomo RA. New beta-lactamase inhibitors in the clinic. *Infect Dis*  
437 *Clin North Am.* 2016;30(2):441-64. doi: 10.1016/j.idc.2016.02.007. PubMed PMID:  
438 27208767; PubMed Central PMCID: PMC4980828.
- 439 41. Bohlmann L, De Oliveira DMP, El-Deeb IM, Brazel EB, Harbison-Price N, Ong CY, et al.  
440 Chemical Synergy between Ionophore PBT2 and Zinc Reverses Antibiotic Resistance.  
441 *MBio.* 2018;9(6):e02391-18. Epub 2018/12/13. doi: 10.1128/mBio.02391-18.  
442 PubMed PMID: 30538186; PubMed Central PMCID: PMCPMC6299484.
- 443 42. Schmidt M, Harmuth S, Barth ER, Wurm E, Fobbe R, Sickmann A, et al. Conjugation of  
444 Ciprofloxacin with Poly(2-oxazoline)s and Polyethylene Glycol via End Groups.  
445 *Bioconjug Chem.* 2015;26(9):1950-62. doi: 10.1021/acs.bioconjchem.5b00393.  
446 PubMed PMID: 26284608.
- 447 43. Tolmasky ME. Aminoglycoside-modifying enzymes: characteristics, localization, and  
448 dissemination. In: Bonomo RA, Tolmasky ME, editors. *Enzyme-Mediated Resistance*  
449 *to Antibiotics: Mechanisms, Dissemination, and Prospects for Inhibition.*  
450 Washington, DC: ASM Press; 2007. p. 35-52.
- 451 44. Wright PM, Seiple IB, Myers AG. The evolving role of chemical synthesis in  
452 antibacterial drug discovery. *Angew Chem Int Ed Engl.* 2014;53(34):8840-69. doi:  
453 10.1002/anie.201310843. PubMed PMID: 24990531; PubMed Central PMCID:  
454 PMC4536949.

- 455 45. Maianti JP, Hanessian S. Structural hybridization of three aminoglycoside antibiotics  
456 yields a potent broad-spectrum bactericide that eludes bacterial resistance enzymes.  
457 Medchemcomm. 2015;7(1):170-7. doi: 10.1039/C5MD00429B
- 458 46. Davies-Sala C, Soler-Bistue A, Bonomo RA, Zorreguieta A, Tolmasky ME. External  
459 guide sequence technology: a path to development of novel antimicrobial  
460 therapeutics. Ann N Y Acad Sci. 2015;1354:98-110. doi: 10.1111/nyas.12755.  
461 PubMed PMID: 25866265; PubMed Central PMCID: PMC4600001.

462

463



464 **Supporting information**

465 **Fig S1. Effect of addition of different reagents on growth of *A. baumannii* strains.**

466

467 **Fig S2. Cytotoxicity tests.**

468

469

470

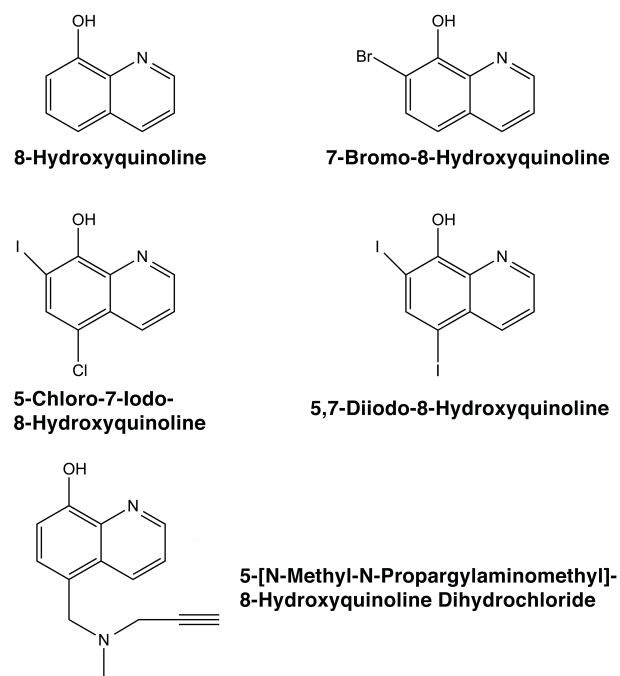

Fig 1. Chemical structures of 8-hydroxyquinoline and derivative compounds.

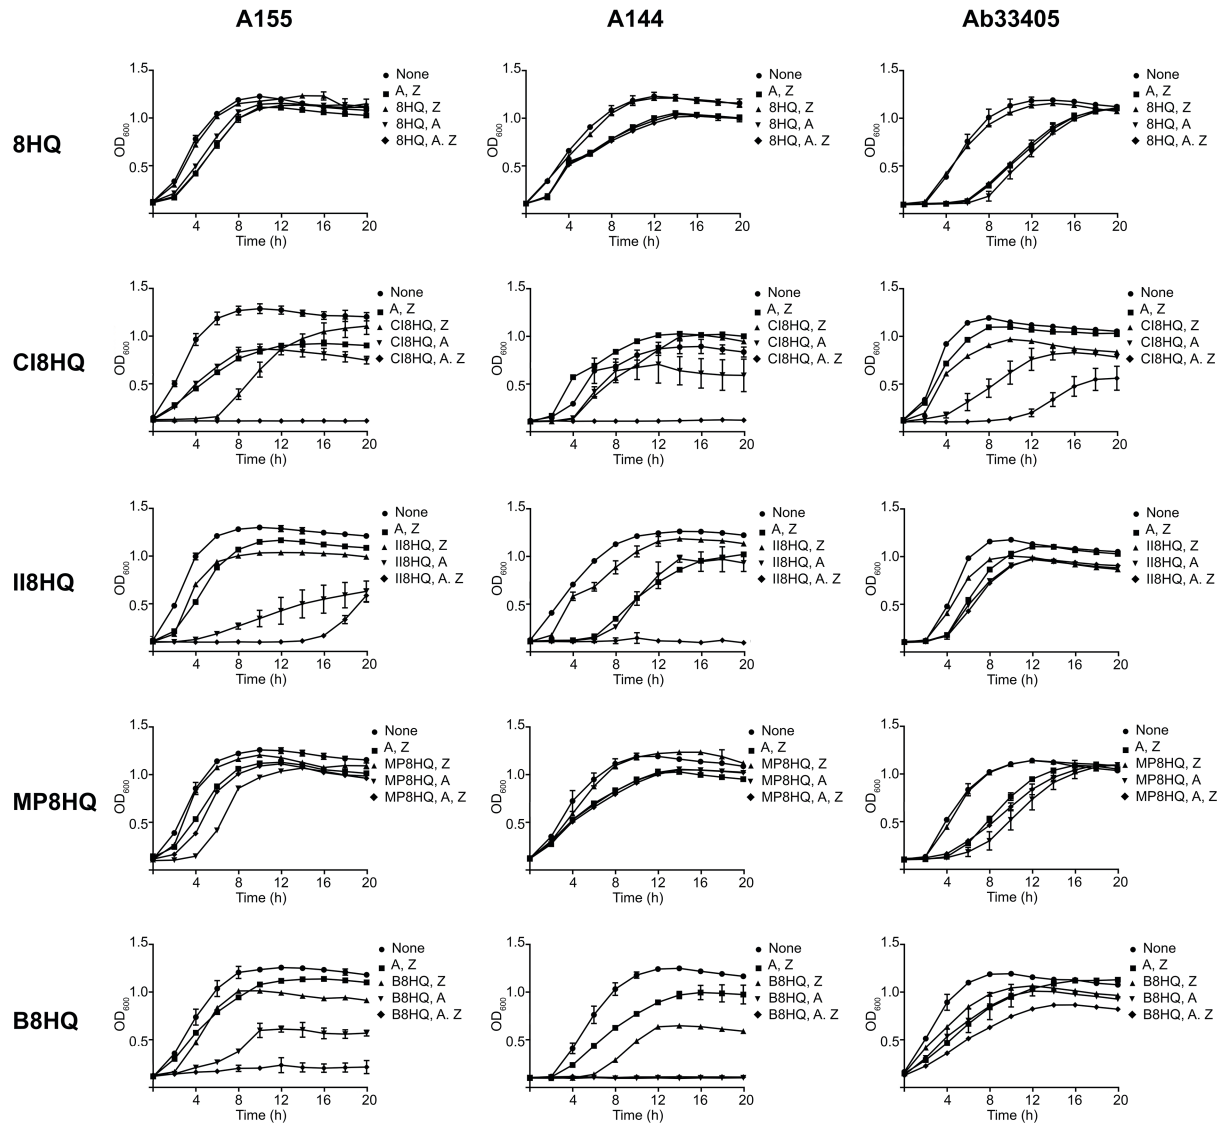

Fig 2. Effect of ionophore-zinc complexes on resistance to amikacin in *A. baumannii* strains. *A. baumannii* A155 (panels to the left), A144 (center panels) or Ab33405 (panels to the right) were cultured in 100  $\mu$ l Mueller-Hinton broth in microtiter plates at 37°C, with the additions indicated in the figure and the OD600 was periodically determined. The concentrations used were 8  $\mu$ g/ml amikacin, 25  $\mu$ M ZnCl<sub>2</sub>, 5  $\mu$ M ionophore. A, amikacin; Z, ZnCl<sub>2</sub>.

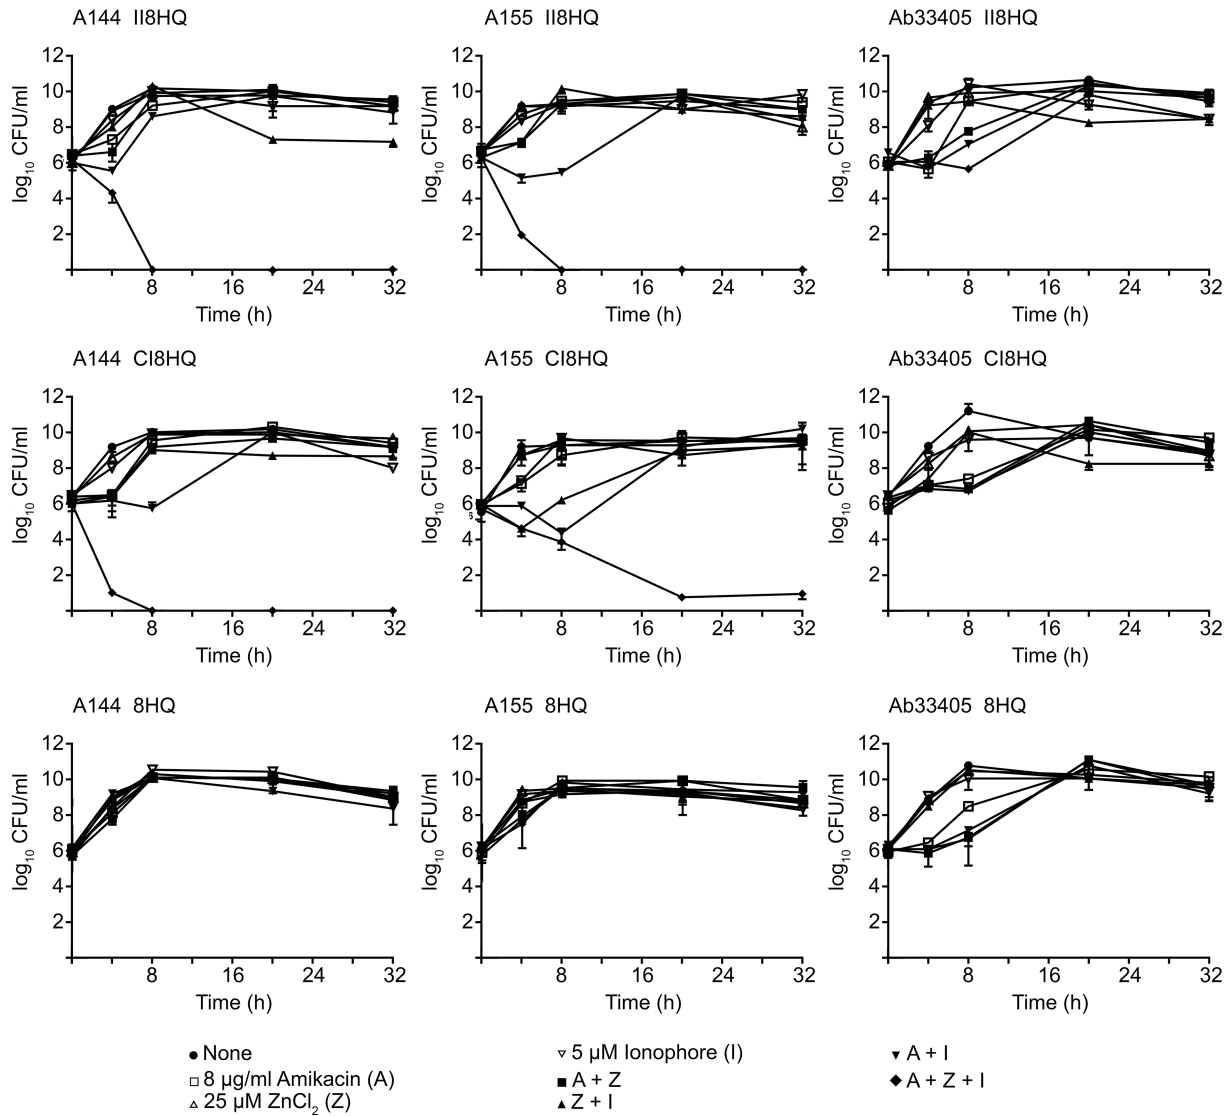

Fig 3. Time-kill assay curves for amikacin in the presence of ionophore-zinc complexes. *A. baumannii* A155 (panels to the left), A144 (center panels) or Ab33405 (panels to the right) were cultured in 100 µl Mueller-Hinton broth in microtiter plates at 37°C, with the additions indicated in the figure and the OD600 was periodically determined. A, amikacin; Z, ZnCl<sub>2</sub>; I, ionophore.

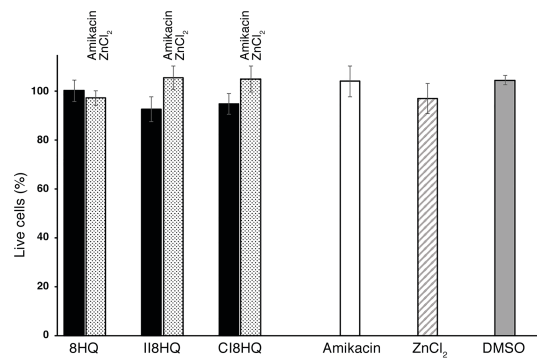

Fig. 4. Cytotoxicity tests. Cytotoxicity on HEK293 cells treated with the indicated concentrations of the different compounds for 24 h was assayed using a LIVE/DEAD kit. The percentage of dead cells was calculated relative to the cells treated with DMSO. Cells incubated with 0.1% Triton X-100 for 10 min were used as a control for maximum toxicity. Experiments were conducted in triplicate and the values are mean  $\pm$  SD. Black bars show survival in the presence of 5  $\mu$ M ionophore. Stippled bars show survival in the presence of 5  $\mu$ M ionophore, 25  $\mu$ M ZnCl<sub>2</sub>, and 8  $\mu$ g/ml amikacin. The same concentrations were used to determine survival in amikacin (white bar) and ZnCl<sub>2</sub> (hatched bar). The concentration of DMSO used in the control was  $\mu$ M (gray bar).
